# Supplementary material for: Luminal breast cancer metastases and tumor arousal from dormancy are promoted by direct actions of estradiol and progesterone on the malignant cells
Source: Springer Nature journal article supplement (doi:10.1186/s13058-014-0489-4), 2014-12-04
Supplement: MOESM1 [file 9781272]

**Table S1. Reagents and Antibodies**

| Chemical/Antibody (ID)     | Target/Application | Dilution/Concentration (w/v) | Source                   |
|----------------------------|--------------------|------------------------------|--------------------------|
| 17 $\beta$ -estradiol      | ER                 | 10 nM                        | Sigma                    |
| Progesterone               | PR                 | 100 nM                       | Sigma                    |
| CK5 (NCL-L-CK5)            | IHC, IF            | 1:100 (0.5 $\mu$ g/ml)       | Leica Microsystems       |
| CK5 (2290-1)               | IHC, IF            | 1:200 (0.05 $\mu$ g/ml)      | Epitomics                |
| CK8/18 (NCL-L-503)         | IHC, IF            | 1:100 (4.2 $\mu$ g/ml)       | Leica Microsystems       |
| Claudin 3 (ab15102)        | IF                 | 1:100 (2 $\mu$ g/ml)         | Abcam                    |
| EGFR (06847)               | IF, IHC            | 1:400 (2.5 $\mu$ g/ml)       | Millipore                |
| ER- $\alpha$ (SP1)         | IHC, IF            | 1:100*                       | Neomarkers               |
| Her2 (SP3)                 | IF                 | 1:50*                        | Neomarkers               |
| Ki67 (MIB-1)               | IHC                | 1:50*                        | DAKO                     |
| PR (Clone 1294)            | IHC, IF            | 1:100 (0.266 $\mu$ g/ml)     | DAKO                     |
| PR (SP2)                   | IHC, IF            | 1:200*                       | Neomarkers               |
| Phospho Histone H3 (Ser10) | IF                 | 1:200 (1 $\mu$ g/ml)         | Millipore                |
| Vimentin (V9)              | IF                 | 1:100 (2 $\mu$ g/ml)         | Santa Cruz Biotechnology |

Abbreviations: IHC, immunohistochemistry; IF, immunofluorescence

*\*ER, HER2, Ki67 and PR antibodies indicated were supplied as tissue culture supernatants*
