# Supplementary material for: Luminal breast cancer metastases and tumor arousal from dormancy are promoted by direct actions of estradiol and progesterone on the malignant cells
Source: Springer Nature journal article supplement (doi:10.1186/s13058-014-0489-4), 2014-12-04

# Additional File 7

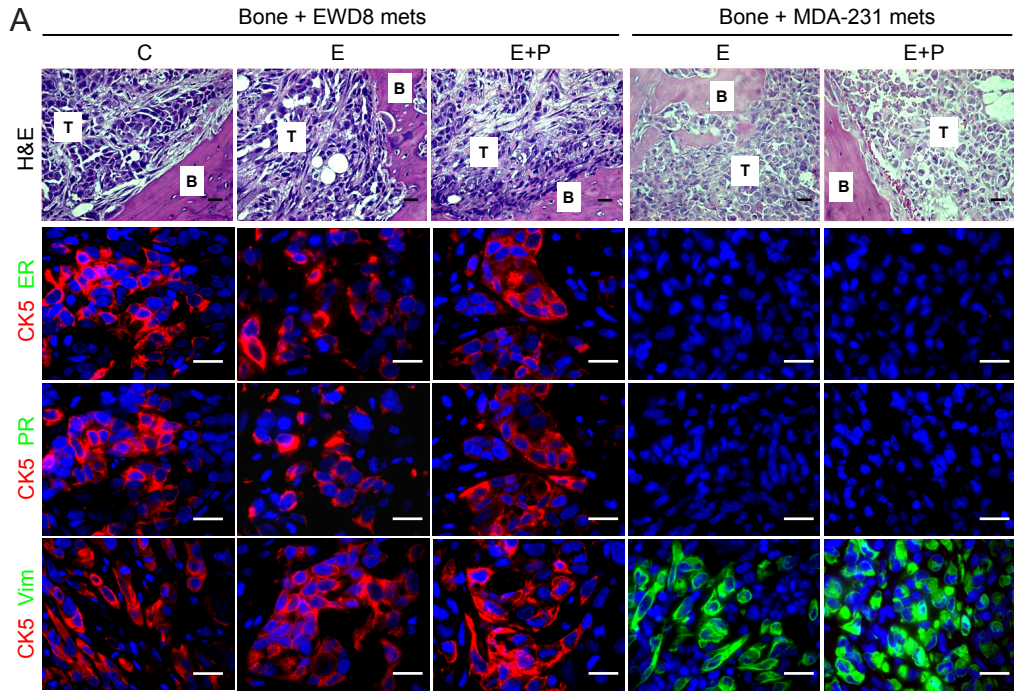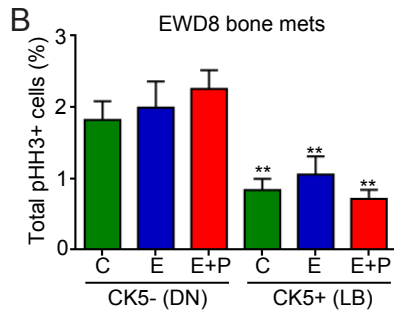

Supplement: MOESM7 [file 9781272]
